# Supplementary material for: From Buffer to Conduit: Family Resilience as a Conditional Mediator Between Caregiver Burden and Patient Quality of Life in Chinese Stroke Families
Source: Research Square preprint supplement (doi:10.21203/rs.3.rs-8401503/v1), 2025-12-31
Supplement: Supplementary file 1 [file 064406e59536f9588ef09d6b.docx]

| **Supplementary Table 1. Mean Scores of Study Variables across the Two Latent Profiles(N=311)** | | | | | | | |
| --- | --- | --- | --- | --- | --- | --- | --- |
| **Number of Profiles** | **AIC** | **BIC** | **aBIC** | **Entropy** | **LMRT ( p-value)** | **BLRT ( p-value)** | **Profile Probabilities (n)** |
| **1 - Class** | 12596.744 | 12686.499 | 12610.38 | — | — | — | 1 |
| **2 - Class** | 10954.256 | 11092.628 | 10975.277 | 0.928 | 0.0393 | 0.0379 | 140/171 |
| **3 - Class** | 10283.078 | 10470.068 | 10311.486 | 0.939 | 0.0001 | 0.0001 | 89 /130 / 92 |
| **4 - Class** | 10071.9208 | 10307.527 | 10107.714 | 0.924 | 0.258 | 0.254 | 54 /79 / 76/84 |
| Note. The 2-class solution (highlighted in bold) was selected as the final model. This decision was based on: (1) a significant improvement in fit over the 1-class model (significant LMRT/BLRT); (2) superior parsimony and clinical interpretability compared to more complex models; and crucially, (3) ensuring adequate sample size in each class for subsequent group-based analyses (e.g., mediation). The 3-class solution, despite marginally better fit indices (e.g., lower AIC/BIC), created a class with a relatively small sample size (n = 89, 28.6%), which was deemed insufficient for stable subgroup analyses. AIC = Akaike Information Criterion; BIC = Bayesian Information Criterion; aBIC = Sample-Size Adjusted BIC; LMRT = Lo-Mendell-Rubin Adjusted Likelihood Ratio Test; BLRT = Bootstrap Likelihood Ratio Test. | | | | | | | |
|
|
|
|
